# Supplementary material for: Highly efficient and stable semi-transparent perovskite solar modules with a trilayer anode electrode
Source: Royal Society of Chemistry journal article supplement (doi:10.1039/c8nr06095a), 2018-01-01
Supplement: c8nr06095a1.pdf [file c8nr06095a1.pdf]

## Supporting information

### Highly efficient and stable semi-transparent perovskite solar modules with a trilayer anode electrode

Kun-Mu Lee<sup>1,2,3\*</sup>, Kai-Shiang Chen<sup>1</sup>, Jia-Ren Wu<sup>4</sup>, Yan-Duo Lin<sup>5\*</sup>, Sheng-Min Yu<sup>6</sup> and Sheng Hsiung Chang<sup>4,\*</sup>

<sup>1</sup>Department of Chemical and Materials Engineering, Chang Gung University, Taoyuan 33302, Taiwan, ROC

<sup>2</sup>Division of Neonatology, Department of Pediatrics, Chang Gung Memorial Hospital, Linkou, Taoyuan 33305, Taiwan, ROC

<sup>3</sup>Center for Reliability Sciences and Technologies, Chang Gung University, Taoyuan 33302, Taiwan, ROC

<sup>4</sup>Department of Physics, Chung Yuan Christian University, Taoyuan 32023, Taiwan, ROC

<sup>5</sup>Department of Applied Chemistry, National Chiayi University, 60004 Chiayi, Taiwan, ROC

<sup>6</sup>Material and Chemical Research Laboratory, Industrial Technology Research Institute, Hsinchu 31040, Taiwan ROC

Corresponding author:

Sheng Hsiung Chang, E-mail: shchang@cycu.edu.tw

Kun-Mu Lee, E-mail: kmlee@mail.cgu.edu.tw

Yan-Duo Lin, E-mail: ydlin@mail.ncyu.edu.tw

Telephone: +886-3-265-3208; Fax : 886-3-265-3299

#### Synthesis of CT

A heterogeneous mixture of 2 M K<sub>2</sub>CO<sub>3</sub> (5 mL), THF (6 mL), **1** (1.00 g, 1.75 mmol), **2** (0.28 g, 0.83 mmol), and Pd(PPh<sub>3</sub>)<sub>4</sub> (0.038 g, 4 mol%) under argon was heated at 80 °C for 18 h. The mixture was extracted with CH<sub>2</sub>Cl<sub>2</sub>. The organic layer was dried over anhydrous MgSO<sub>4</sub>. Evaporation of the solvent gave a crude product, which was purified by silica gel column chromatography eluted with CH<sub>2</sub>Cl<sub>2</sub>/hexane (1/1) to

afford the desired product as a yellow solid in 70% yield. mp 100-102 °C; <sup>1</sup>H NMR (400 MHz, DMSO-*d*<sub>6</sub>, δ): 7.45 (d, *J* = 8.4 Hz, 4H), 7.42 (s, 2H), 7.03 (d, *J* = 8.2 Hz, 8H), 6.91 (d, *J* = 8.2 Hz, 8H), 6.76 (d, *J* = 8.4 Hz, 4H), 3.95 (t, *J* = 6.4 Hz, 4H), 3.65 (s, 2H), 1.77-1.82 (m, 4H), 1.47-1.51 (m, 4H), 1.35-1.40 (m, 8H), 0.94 (t, *J* = 6.8 Hz, 6H) ppm; <sup>13</sup>C NMR (100 MHz, DMSO-*d*<sub>6</sub>, δ): 156.4, 150.8, 148.1, 144.1, 140.3, 136.22, 127.2, 126.2, 120.0, 118.8, 117.1, 115.5, 67.7, 33.8, 30.9, 28.6, 25.2, 22.0, 13.8 ppm; HRMS (FAB) *m/z* [M<sup>+</sup>] calcd for C<sub>69</sub>H<sub>80</sub>O<sub>4</sub>N<sub>2</sub>S<sub>2</sub>: 1065.5166; found: 1065.5160.

### Synthesis, optical and electrochemical properties

The synthetic route of **CT** is illustrated in **Fig. S1**, and the experimental details are provided in the Experiments section. The **CT** molecule was obtained following a simple synthetic route. *P*-hexthoxytriphenylamine pinacboronates (**1**) and 2,6-dibromo-4*H*-cyclopenta-[2,1-*b*:3,4-*b'*]dithiophene (**2**) were introduced by Suzuki coupling reaction to obtain di-substituted derivative **CT** in good yield. This compound was purified by column chromatography and characterized by <sup>1</sup>H/<sup>13</sup>C NMR spectroscopy and mass spectrometry.

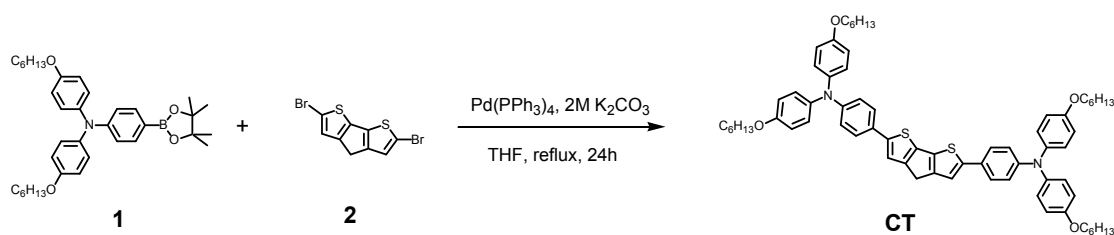

**Fig. S1.** Synthetic route for the **CT** molecule.

Figure S2 presents the absorption and photoluminescence (PL) spectra of **CT** molecules in a chlorobenzene solution (ca. 1x10<sup>-5</sup> M). The absorption spectrum of **CT**

has two prominent peaks at 303 nm and 445 nm. The emission peak of CT locates at 509 nm. The optical band gap ( $E_{0-0}$ ) was estimated from the intersection of the corresponding normalized absorbance and PL spectra. The intersection wavelength of CT is 482 nm, which corresponds to an optical bandgap of 2.57 eV.

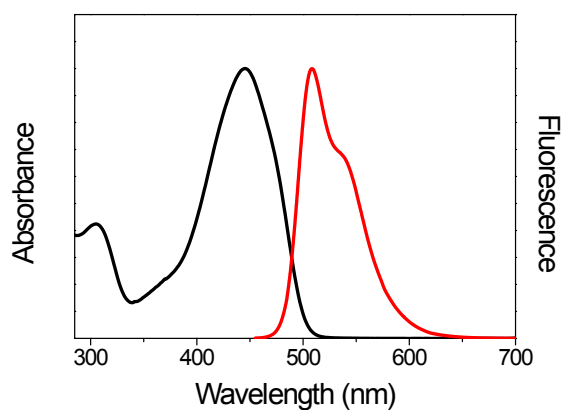

**Fig. S2** Absorption (black line) and emission (red line) spectra of the CT molecules in a chlorobenzene solution ( $1 \times 10^{-5}$  M).

Cyclic voltammetry (CV) and differential pulse voltammetry (DPV) analyses were carried out to identify the electrochemical behaviors of CT molecules. As shown in Figure S3, CT displays reversible multi-oxidative behavior. The HOMO energy level is obtained at -5.17 eV for CT, which is slightly larger than the  $E_{\text{VBM}}$  (-5.43 eV) of  $\text{CH}_3\text{NH}_3\text{PbI}_3$ , as shown in Figure S4.

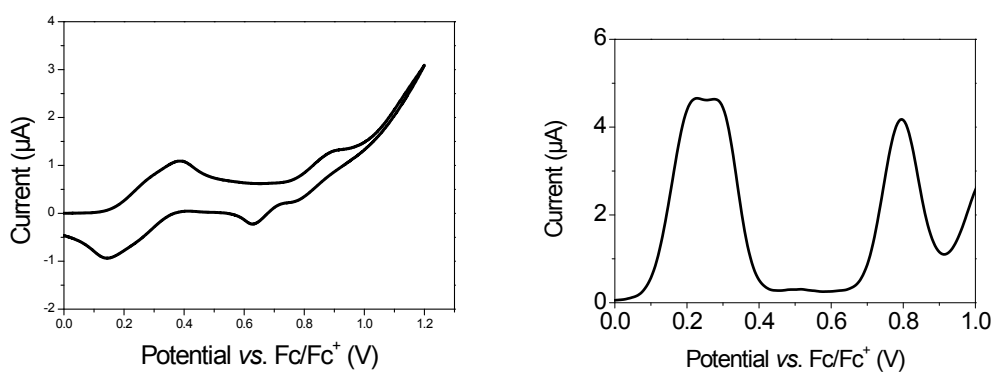

**Fig. S3.** Cyclic voltammograms and differential pulse voltammetry of CT measured at a sweep rate of 100 mV/s in THF solution.

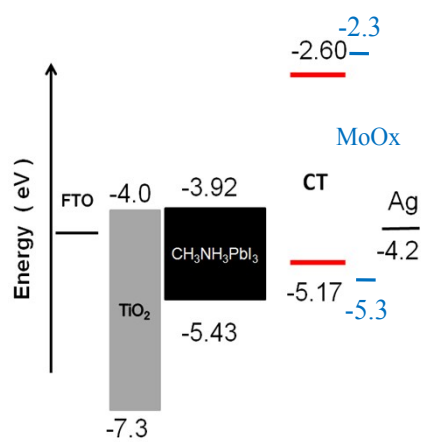

**Fig. S4.** Energy level diagram of the hole-transporting materials used in perovskite solar cells.

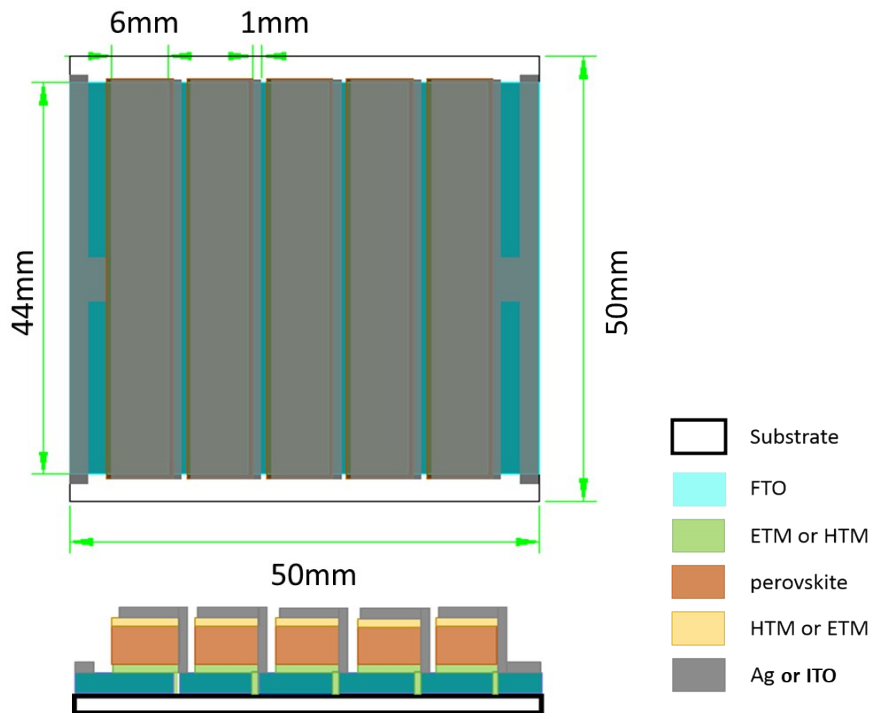

**Fig. S5.** Schematic of perovskite solar module.

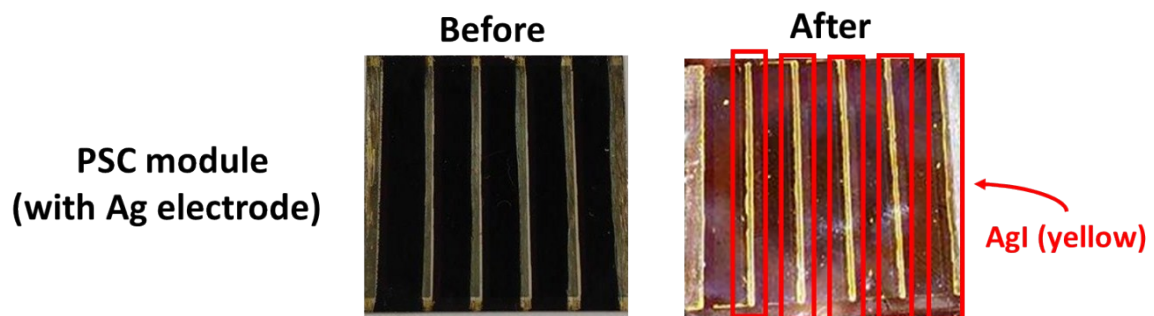

**Fig. S6.** Photo images of perovskite solar module with Ag electrode under a wet environment ( $26^{\circ}\text{C}\pm 2^{\circ}\text{C}$  and  $70\pm 5$  RH%) when  $t=0$  (before) and  $t=250$  hours (after) .

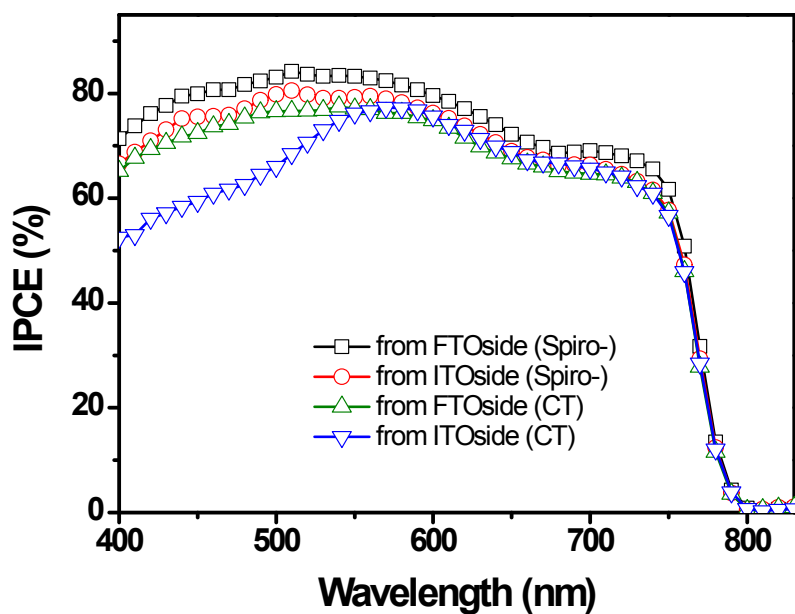

**Fig. S7.** The IPCE of perovskite solar cells measured from FTO side and ITO side.

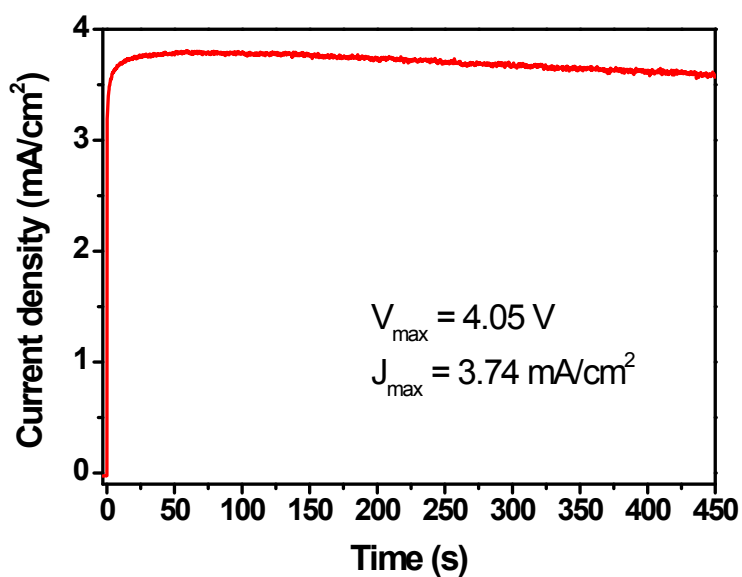

**Fig. S8.** The maximum power point tracking of an ITO/MoO<sub>x</sub>/CT based perovskite solar module under one sun illumination.
